# Supplementary material
Source: MDPI journal article supplement (https://www.mdpi.com/2073-4441/14/15/2403)
Supplement: s1 [file s1]

Supplementary materials

# Uncontrolled Disposal of Used Masks Resulting in Release of Microplastics into Environment

Changrong Zhao <sup>1</sup>, Zhang Ting <sup>1</sup>, Zhaoyang You <sup>1,\*</sup>, Hyunook Kim <sup>2,\*</sup>, Kinjal J. Shah <sup>1</sup>

<sup>1</sup> College of Urban Construction, Nanjing Tech University, Nanjing 211800, China; zcr100032@163.com (C.Z.); misszhang0613@163.com (Z.T.); kjshah@njtech.edu.cn (K.J.S.)

<sup>2</sup> Department of Environmental Engineering, University of Seoul, Seoul 02504, Korea

\* Correspondence: h\_kim@uos.ac.kr (H.K.); youzhaoyang@163.com (Z.Y.); Tel.: +82-2-6490-2871 (H.K.)

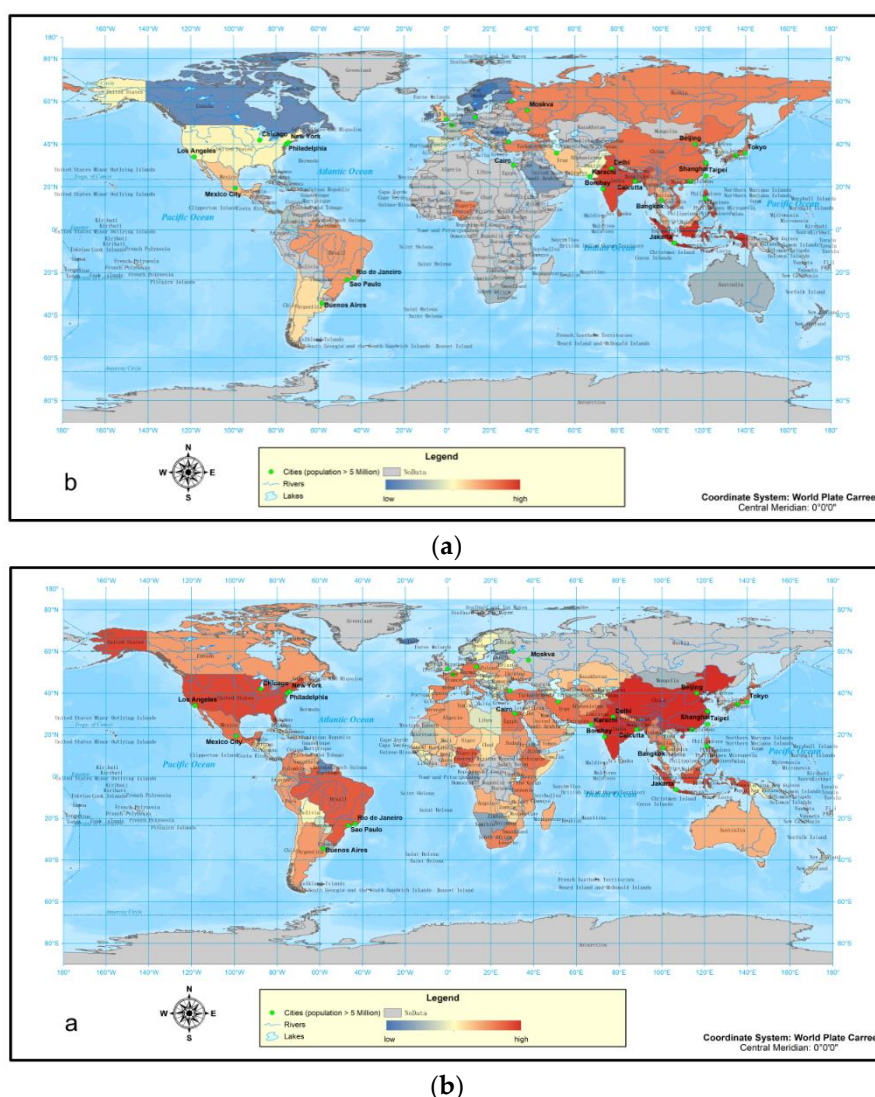

**Figure S1.** (a) Demand for masks in countries around the world (data sources: [21]); (b) emissions of masks in various coastal countries (data sources: [22]).
